# Supplementary figures and images for: ORP5 and ORP8 orchestrate lipid droplet biogenesis and maintenance at ER–mitochondria contact sites
Source: PubMed Central journal article supplement — J Cell Biol. 2022 Aug 12;221(9):e202112107. doi: 10.1083/jcb.202112107 (PMC9375143; doi:10.1083/jcb.202112107), 2022-08-12

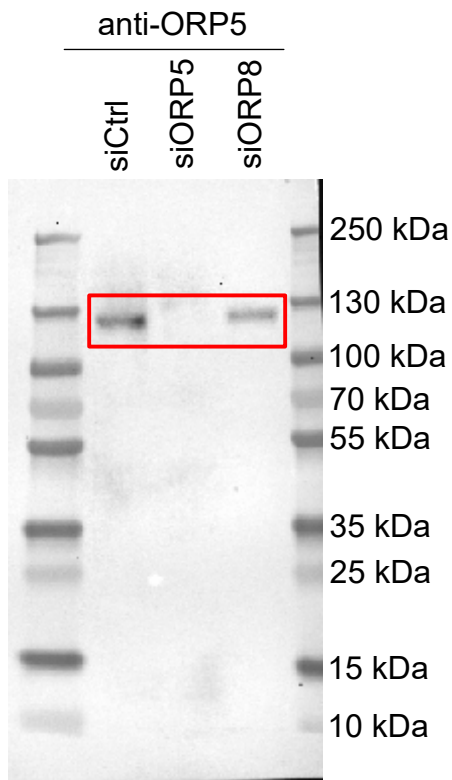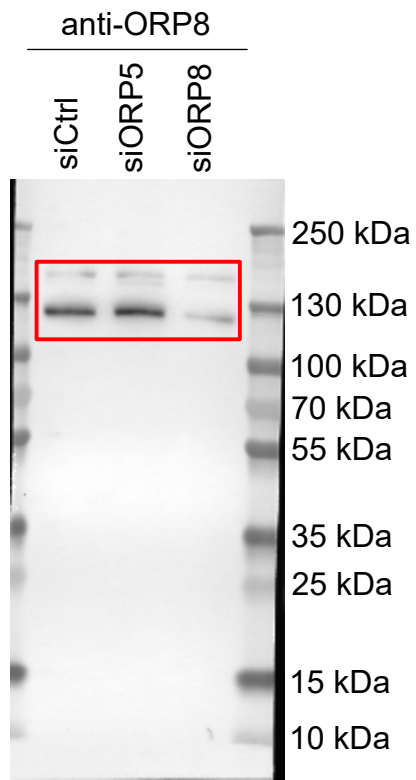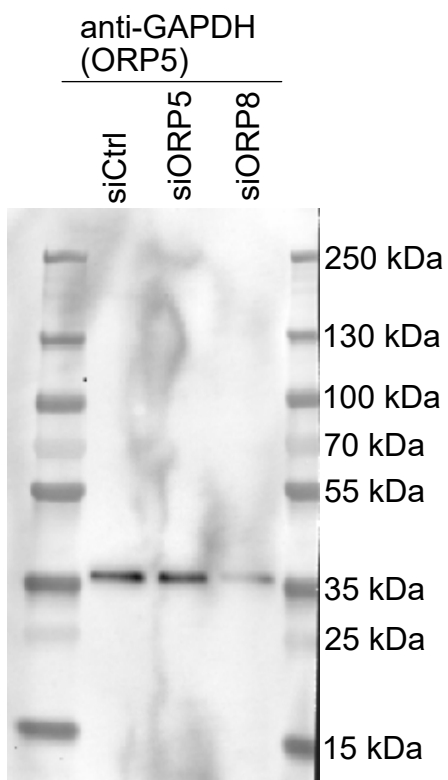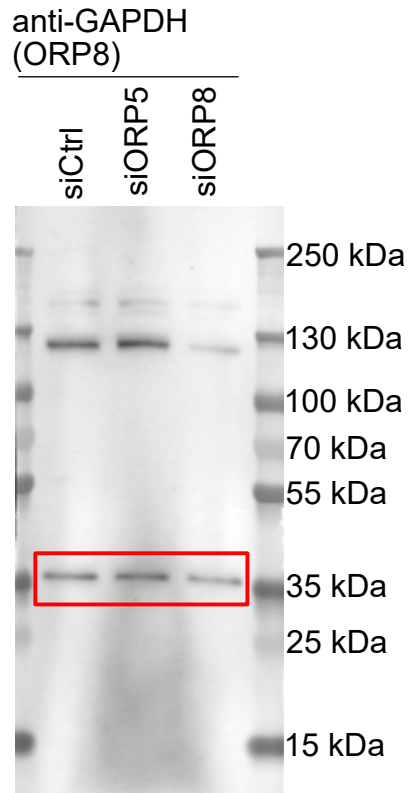

anti-PTPIP51

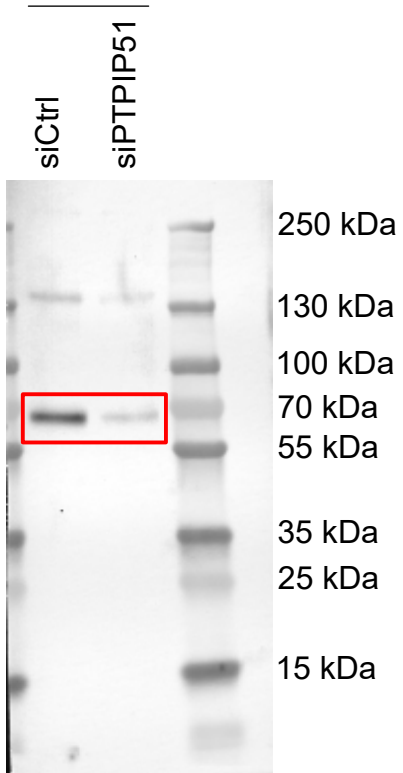

anti-GAPDH  
(PTPIP1)

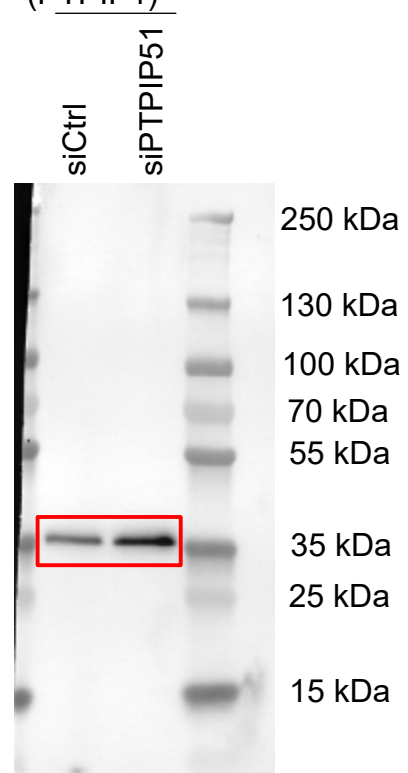

Supplement: JCB_202112107_SourceDataFS2.pdf [file JCB_202112107_SourceDataFS2.pdf]
